# Supplementary material
Source: publisher site journal article supplement (https://www.dovepress.com/article/284102)
Supplement: Supplementary file 1 [file get_supplementary_file.php]

**Supplementary Table 1**. Association between socio-demographic variables and the psychological impact/adverse mental health status of COVID-19 quarantine (n = 214).

| **Variables** | **N (%)** | **psychological distress (IES-R)** | | | **Stress (DASS)** | | | **Anxiety (DASS)** | | | **Depression (DASS)** | | |
| --- | --- | --- | --- | --- | --- | --- | --- | --- | --- | --- | --- | --- | --- |
| **Yes** | **No** | **p** | **Yes** | **No** | **p** | **Yes** | **No** | **p** | **Yes** | **No** | **p** |
| **Family monthly income** | | | | | | | | | | | | | |
| <5000 SAR | 35 (16.4%) | 8 (22.9%) | 27 (77.1%) | 0.948 | 8 (22.9%) | 27 (77.1%) | 0.611 | 8 (22.9%) | 27 (77.1%) | 0.340 | 8 (22.9%) | 27 (77.1%) | 0.339 |
| 5000-9999 SAR | 46 (21.5%) | 13 (28.3%) | 33 (71.7%) | 10 (21.7%) | 36 (78.3%) | 5 (10.9%) | 41 (89.1%) | 21 (45.7%) | 25 (54.3%) |
| 10000-14999 SAR | 55 (25.7%) | 16 (29.1%) | 39 (70.9%) | 14 (25.5%) | 41 (74.5%) | 13 (23.6%) | 42 (76.4%) | 16 (29.1%) | 39 (70.9%) |
| 15000-19999 SAR | 34 (15.9%) | 11 (32.4%) | 23 (67.6%) | 13 (38.2%) | 21 (61.8%) | 11 (32.4%) | 23 (67.6%) | 12 (35.3%) | 22 (64.7%) |
| 20000-24999 SAR | 10 (4.7%) | 2 (20.0%) | 8 (80.0%) | 2 (20.0%) | 8 (80.0%) | 2 (20.0%) | 8 (80.0%) | 3 (30.0%) | 7 (70.0%) |
| >25000 SAR | 34 (15.9%) | 10 (29.4%) | 24 (70.6%) | 8 (23.5%) | 26 (76.5%) | 7 (20.6%) | 27 (79.4%) | 10 (29.4%) | 24 (70.6%) |
| **Housing type** | | | | | | | | | | | | | |
| Floor in a villa | 22 (10.3%) | 6 (27.3%) | 16 (72.7%) | 0.108 | 2 (9.1%) | 20 (90.9%) | **0.042** | 4 (18.2%) | 18 (81.8%) | 0.912 | 4 (18.2%) | 18 (81.8%) | 0.162 |
| Apartment | 98 (45.8%) | 21 (21.4%) | 77 (78.6%) | 22 (22.4%) | 76 (77.6%) | 21 (21.4%) | 77 (78.6%) | 30 (30.6%) | 68 (69.4%) |
| Villa | 94 (43.9%) | 33 (35.1%) | 61 (64.9%) | 31 (33.0%) | 63 (67.0%) | 21 (22.3%) | 73 (77.7%) | 36 (38.3%) | 58 (61.7%) |
| **Number of individuals residing in the household** | | | | | | | | | | | | | |
| 1 person | 7 (3.3%) | 0 (0.0%) | 7 (100.0%) | **0.035** | 1 (14.3%) | 6 (85.7%) | 0.387 | 0 (0.0%) | 7 (100.0%) | 0.083 | 1 (14.3%) | 6 (85.7%) | **0.039** |
| 2 people | 29 (13.6%) | 3 (10.3%) | 26 (89.7%) | 5 (17.2%) | 24 (82.8%) | 2 (6.9%) | 27 (93.1%) | 4 (13.8%) | 25 (86.2%) |
| 3-5 people | 94 (43.9%) | 30 (31.9%) | 64 (68.1%) | 29 (30.9%) | 65 (69.1%) | 23 (24.5%) | 71 (75.5%) | 38 (40.4%) | 56 (59.6%) |
| >6 people | 84 (39.3%) | 27 (32.1%) | 57 (67.9%) | 20 (23.8%) | 64 (76.2%) | 21 (25.0%) | 63 (75.0%) | 27 (32.1%) | 57 (67.9%) |
| *Bolded p-values are significant* | | | | | | | | | | | | | |

Supplementary Table 2. Relationship between knowledge/concerns about COVID-19 and the psychological impact/adverse mental health status of COVID-19 quarantine (n = 214).

| **Variables** | **N (%)** | **psychological distress (IES-R)** | | | **Stress (DASS)** | | | **Anxiety (DASS)** | | | **Depression (DASS)** | | |
| --- | --- | --- | --- | --- | --- | --- | --- | --- | --- | --- | --- | --- | --- |
| **Yes** | **No** | **p** | **Yes** | **No** | **p** | **Yes** | **No** | **p** | **Yes** | **No** | **p** |
| **Sources of information about COVID-19** | | | | | | | | | | | | | |
| **Ministry of health** | | | | | | | | | | | | | |
| Yes | 187 (87.4%) | 50 (26.7%) | 137 (73.3%) | 0.265 | 47 (25.1%) | 140 (74.9%) | 0.617 | 40 (21.4%) | 147 (78.6%) | 0.922 | 60 (32.1%) | 127 (67.9%) | 0.608 |
| No | 27 (12.6%) | 10 (37.0%) | 17 (63.0%) | 8 (29.6%) | 19 (70.4%) | 6 (22.2%) | 21 (77.8%) | 10 (37.0%) | 17 (63.0%) |
| **Non-official social media applications and platforms (e.g. WhatsApp, Twitter, YouTube, etc.)** | | | | | | | | | | | | | |
| Yes | 58 (27.1%) | 18 (31.0%) | 40 (69.0%) | 0.552 | 15 (25.9%) | 43 (74.1%) | 0.974 | 14 (24.1%) | 44 (75.9%) | 0.566 | 18 (31.0%) | 40 (69.0%) | 0.750 |
| No | 156 (72.9%) | 42 (26.9%) | 114 (73.1%) | 40 (25.6%) | 116 (74.4%) | 32 (20.5%) | 124 (79.5%) | 52 (33.3%) | 104 (66.7%) |
| **World Health Organization** | | | | | | | | | | | | | |
| Yes | 83 (38.8%) | 21 (25.3%) | 62 (74.7%) | 0.478 | 20 (24.1%) | 63 (75.9%) | 0.669 | 17 (20.5%) | 66 (79.5%) | 0.774 | 28 (33.7%) | 55 (66.3%) | 0.799 |
| No | 131 (61.2%) | 39 (29.8%) | 92 (70.2%) | 35 (26.7%) | 96 (73.3%) | 29 (22.1%) | 102 (77.9%) | 42 (32.1%) | 89 (67.9%) |
| **Electronic newspapers** | | | | | | | | | | | | | |
| Yes | 50 (23.4%) | 12 (24.0%) | 38 (76.0%) | 0.468 | 13 (26.0%) | 37 (74.0%) | 0.956 | 12 (24.0%) | 38 (76.0%) | 0.622 | 17 (34.0%) | 33 (66.0%) | 0.824 |
| No | 164 (76.6%) | 48 (29.3%) | 116 (70.7%) | 42 (25.6%) | 122 (74.4%) | 34 (20.7%) | 130 (79.3%) | 53 (32.3%) | 111 (67.7%) |
| *Bolded p-values are significant* | | | | | | | | | | | | | |

Supplementary Table 3. Regression analyses to identify sociodemographic predictors of PTSD, stress, anxiety, and depression

| **Sociodemographic variables** | **psychological distress** | | **Stress** | | **Anxiety** | | **Depression** | |
| --- | --- | --- | --- | --- | --- | --- | --- | --- |
| **Odds ratio** | **p-value** | **Odds ratio** | **p-value** | **Odds ratio** | **p-value** | **Odds ratio** | **p-value** |
| Sex | 0.408 | 0.008* | 0.315 | 0.001* | 0.469 | 0.040* | 0.461 | 0.020* |
| Age | 1.788 | 0.169 | 1.213 | 0.655 | 1.182 | 0.708 | 1.061 | 0.885 |
| Level of education | 1.871 | 0.125 | 0.503 | 0.147 | 0.594 | 0.294 | 1.090 | 0.828 |
| Marital status | 2.455 | 0.205 | 1.968 | 0.347 | 6.112 | 0.036* | 6.404 | 0.023* |
| Number of children | 3.307 | 0.092 | 1.778 | 0.420 | 5.445 | 0.052 | 4.793 | 0.053 |
| Employment status | 0.815 | 0.699 | 1.999 | 0.244 | 1.836 | 0.378 | 2.507 | 0.111 |
| Work in medical field | 0.468 | 0.258 | 0.417 | 0.168 | 0.513 | 0.322 | 0.542 | 0.281 |
| Has family member working in medical field | 0.488 | 0.070 | 0.887 | 0.761 | 0.820 | 0.631 | 0.462 | 0.046* |
| Monthly income | 0.655 | 0.261 | 0.952 | 0.899 | 0.645 | 0.288 | 1.314 | 0.440 |
| House type | 0.609 | 0.243 | 0.352 | 0.021* | 1.245 | 0.630 | 0.540 | 0.140 |
| Number living in household | 0.787 | 0.550 | 1.943 | 0.116 | 0.614 | 0.280 | 1.316 | 0.490 |
| **p-value is significant at p < 0.05* | | | | | | | | |
